# Supplementary material
Source: PubMed Central journal article supplement (PMC2698387)
Supplement: supp_191_12_3992__1.pdf [file supp_191_12_3992__1.pdf]

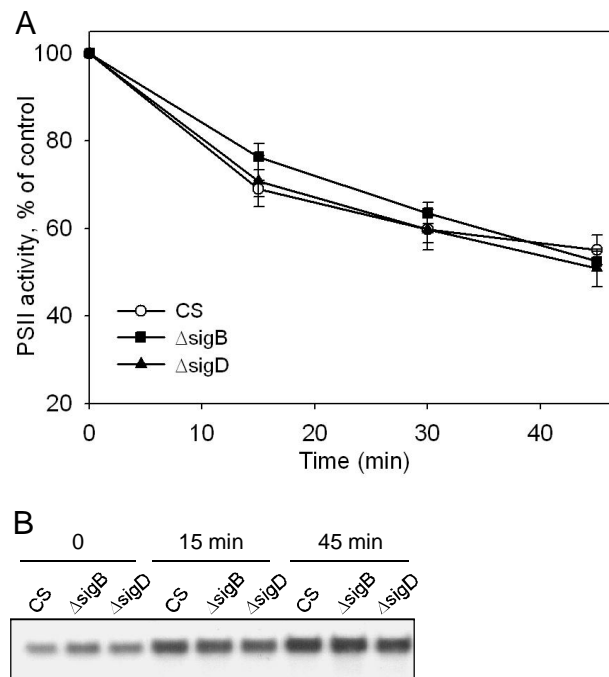

**FIG S1.** Photoinhibition of the control,  $\Delta\text{sigB}$  and  $\Delta\text{sigD}$  strains. (A) Cell cultures were illuminated at the PPFD of  $1500 \mu\text{mol m}^{-2}\text{s}^{-1}$  and light saturated PSII activity was measured after 0, 15 min, 30 min and 45 min of illumination with a Clark-type oxygen electrode at  $32^\circ\text{C}$  using  $0.7 \text{ mM}$  2,6-dichlorobenzquinone as artificial electron acceptor. PSII activity is expressed as percentage of the activity measured from non-treated control samples. Each data point represents an average of three independent experiments and the error bars denote SE. (B) Representative Northern blot showing *psbA* mRNAs after 0, 15 and 45 min treatment at the PPFD of  $1500 \mu\text{mol m}^{-2}\text{s}^{-1}$ . RNA isolations and Northern hybridizations were performed as described in Tyystjärvi et al. (2001) Mol. Microbiol. 40:476-484.  $5 \mu\text{g}$  of total RNA was loaded in each well.
